# Supplementary material
Source: HighWire-hosted journal article supplement (https://thorax.bmj.com/content/thoraxjnl-2020-216189)
Supplement: inline-supplementary-material-1 [file inline-supplementary-material-1.pdf]

## Supplement

## Identifying preventable risk factors for hospitalised asthma in young Aboriginal children: a whole-population cohort study.

BK Brew, AJ Gibberd, GB Marks, N Strobel, CW Allen, L Jorm, G Chambers, SJ Eades, BJ McNamara

Table S1. ICD-10-AM codes

|                                       |                                                                                                                              |
|---------------------------------------|------------------------------------------------------------------------------------------------------------------------------|
| Asthma                                | J45 J46                                                                                                                      |
| Bronchiectasis                        | J47                                                                                                                          |
| Wheeze Symptoms                       | R06.2                                                                                                                        |
| Acute Respiratory Tract Infection     | J00-J04, J06, J09-J18, J21, J22                                                                                              |
| <b>Maternal Psychological Trauma:</b> |                                                                                                                              |
| Mental health                         | F00-F09, F20-F48, F60-F69                                                                                                    |
| Assault                               | X85-X99, Y00-Y09                                                                                                             |
| Alcohol or Drug abuse                 | F10-F19, T40, T41, R780-R785, Z714, Z721, T411, T423, T424, T507, T509, X41-X44, X64, Y10, Y11, Y14, X45, X65, Y15, Y90, Y91 |

Figure S1. Directed Acyclic Graph

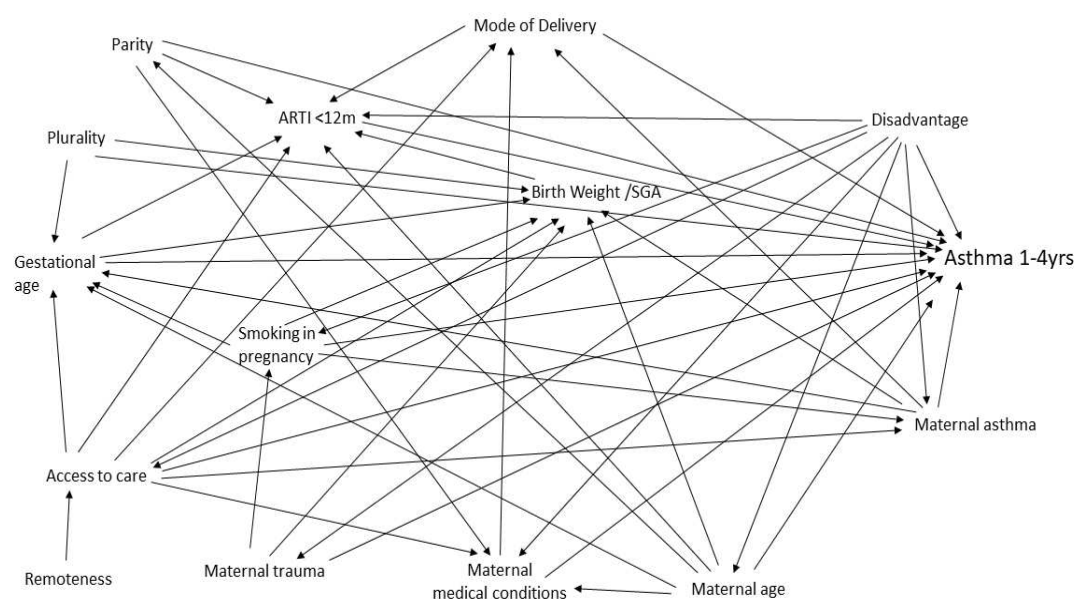

**Table S2. Sensitivity Analysis. Associations between risk factors and asthma (broad definition) in Aboriginal children 1-4 years (Odds Ratios and 95% Confidence Intervals).**

| Risk Factors                         | ASTHMA-BROAD<br>Adjusted OR<br>(95% CI) | Potential confounders used in adjusted<br>models (see Figure S1)                                                            |
|--------------------------------------|-----------------------------------------|-----------------------------------------------------------------------------------------------------------------------------|
| <b>Maternal age (years)</b>          |                                         | <i>Disadvantage</i>                                                                                                         |
| ≤19                                  | 0.99 (0.82, 1.20)<br>p=0.92             |                                                                                                                             |
| 20-24                                | 0.95 (0.80, 1.14)<br>p= 0.60            |                                                                                                                             |
| 25-29                                | 1.06 (0.88, 1.27)<br>p=0.55             |                                                                                                                             |
| ≥ 30                                 | Reference                               |                                                                                                                             |
| <b>Plurality</b>                     |                                         | <i>Gestational age,<br/>birth weight</i>                                                                                    |
| Singleton                            | Reference                               |                                                                                                                             |
| Multiples                            | 0.77 (0.52, 1.14)<br>p=0.20             |                                                                                                                             |
| <b>Parity</b>                        |                                         | <i>Maternal age</i>                                                                                                         |
| 0                                    | Reference                               |                                                                                                                             |
| ≥ 1                                  | 0.95 (0.81, 1.11)<br>p=0.54             |                                                                                                                             |
| <b>Gestational age (weeks)</b>       |                                         | <i>Maternal age, smoking in pregnancy,<br/>maternal asthma, remoteness, plurality</i>                                       |
| Very preterm <33                     | 3.39 (2.66, 4.31)<br>p<0.0001           |                                                                                                                             |
| Preterm 33-36                        | 1.40 (1.12, 1.74)<br>p= 0.003           |                                                                                                                             |
| Early term 37-38                     | 1.03 (0.88, 1.20)<br>p=0.67             |                                                                                                                             |
| At term 39-40                        | Reference                               |                                                                                                                             |
| Post-term >40                        | 1.04 (0.83, 1.30)<br>p=0.75             |                                                                                                                             |
| <b>Birth weight (g)</b>              |                                         | <i>Maternal age, smoking in pregnancy,<br/>maternal trauma, maternal asthma,<br/>gestational age, remoteness, plurality</i> |
| Very low (<1500)                     | 1.88 (1.17, 3.01)<br>p=0.009            |                                                                                                                             |
| Low (1500-2499)                      | 1.19 (0.93, 1.52)<br>p= 0.16            |                                                                                                                             |
| Normal (2500-4000)                   | Reference                               |                                                                                                                             |
| High (>4000)                         | 0.88 (0.68, 1.14)<br>p=0.33             |                                                                                                                             |
| <b>Small for gestational age</b>     | 1.03 (0.87, 1.23)<br>p=0.71             | <i>Maternal age, smoking in pregnancy,<br/>maternal trauma, maternal asthma,<br/>remoteness</i>                             |
| <b>Maternal smoking in pregnancy</b> | 1.05 (0.92, 1.20)<br>p=0.46             | <i>Maternal trauma, disadvantage</i>                                                                                        |
| <b>Maternal asthma</b>               | 1.51 (1.27, 1.79)<br>p<0.0001           | <i>Disadvantage, smoking in pregnancy,<br/>remoteness</i>                                                                   |

|                                                    |                               |                                                                                                      |
|----------------------------------------------------|-------------------------------|------------------------------------------------------------------------------------------------------|
| <b>Maternal medical conditions</b>                 | 1.07 (0.88, 1.31)<br>p=0.50   | <i>Disadvantage, parity, maternal age, remoteness</i>                                                |
| <b>Mode of delivery</b>                            |                               | <i>Maternal asthma, maternal medical conditions, remoteness</i>                                      |
| <b>Vaginal</b>                                     | Reference                     |                                                                                                      |
| <b>Elective caesarean section</b>                  | 0.97 (0.76, 1.22)<br>p=0.77   |                                                                                                      |
| <b>Emergency caesarean section</b>                 | 1.15 (0.97, 1.37)<br>p=0.11   |                                                                                                      |
| <b>Maternal trauma</b>                             | 1.28 (1.05, 1.57)<br>p=0.02   | <i>Disadvantage</i>                                                                                  |
| <b>Disadvantage</b>                                |                               | <i>Maternal age</i>                                                                                  |
| <b>Q5 (least)</b>                                  | Reference                     |                                                                                                      |
| <b>Q4</b>                                          | 1.06 (0.73, 1.55)<br>p=0.76   |                                                                                                      |
| <b>Q3</b>                                          | 1.18 (0.83, 1.67)<br>p=0.35   |                                                                                                      |
| <b>Q2</b>                                          | 1.06 (0.76, 1.49)<br>p=0.72   |                                                                                                      |
| <b>Q1 (most)</b>                                   | 1.17 (0.85, 1.61)<br>p=0.34   |                                                                                                      |
| <b>Area level remoteness of residence at Birth</b> |                               | <i>Disadvantage</i>                                                                                  |
| <b>Major cities</b>                                | Reference                     |                                                                                                      |
| <b>Inner regional</b>                              | 0.89 (0.70, 1.12)<br>p=0.32   |                                                                                                      |
| <b>Outer regional</b>                              | 1.11 (0.93, 1.34)<br>p=0.24   |                                                                                                      |
| <b>Remote</b>                                      | 0.97 (0.81, 1.18)<br>p=0.79   |                                                                                                      |
| <b>Very remote</b>                                 | 0.82 (0.67, 1.00)<br>p=0.05   |                                                                                                      |
| <b>ARTI &lt;1 year</b>                             | 3.75 (3.24, 4.28)<br>p<0.0001 | <i>Delivery method, disadvantage, birthweight, maternal age, parity, gestational age, remoteness</i> |

**Table S3. Sensitivity Analysis Population attributable fractions for potentially preventable risk factors for asthma (broad definition- including wheeze and bronchiectasis as main diagnosis).**

| <b>Risk Factor</b>                      | <b>Population attributable fraction % (95% CI)*</b> |
|-----------------------------------------|-----------------------------------------------------|
| <b>ARTI &lt; 1 year</b>                 | 28.2 (26.5, 29.4)                                   |
| <b>Disadvantage (lowest quintile)</b>   | 7.4 (-8.9, 19.2)                                    |
| <b>Very preterm &lt;33 weeks</b>        | 7.0 (6.2, 7.7)                                      |
| <b>Preterm 33-36 weeks</b>              | 3.3 (1.2, 4.9)                                      |
| <b>Very low birth weight &lt; 1500g</b> | 2.6 (0.8, 3.7)                                      |
| <b>Low birth weight 1500-2500g</b>      | 2.3 (-1.1, 4.9)                                     |
| <b>Maternal trauma</b>                  | 2.4 (0.5, 4.0)                                      |
| <b>Maternal smoking in pregnancy</b>    | 2.2 (-4.0, 7.7)                                     |
| <b>Emergency caesarean section</b>      | 2.1 (-0.5, 4.3)                                     |

\*Population attributable fractions based on adjusted odds ratios
